# Supplementary material for: Functional analysis of N-acetylglucosaminyltransferase-I knockdown in 2D and 3D neuroblastoma cell cultures
Source: PubMed Central journal article supplement (PMC8575246; doi:10.1371/journal.pone.0259743), 2021-11-08
Supplement: pone.0259743.s001.pdf [file pone.0259743.s001.pdf]

# S1. Gelatinase of 3D samples

Figure 7C

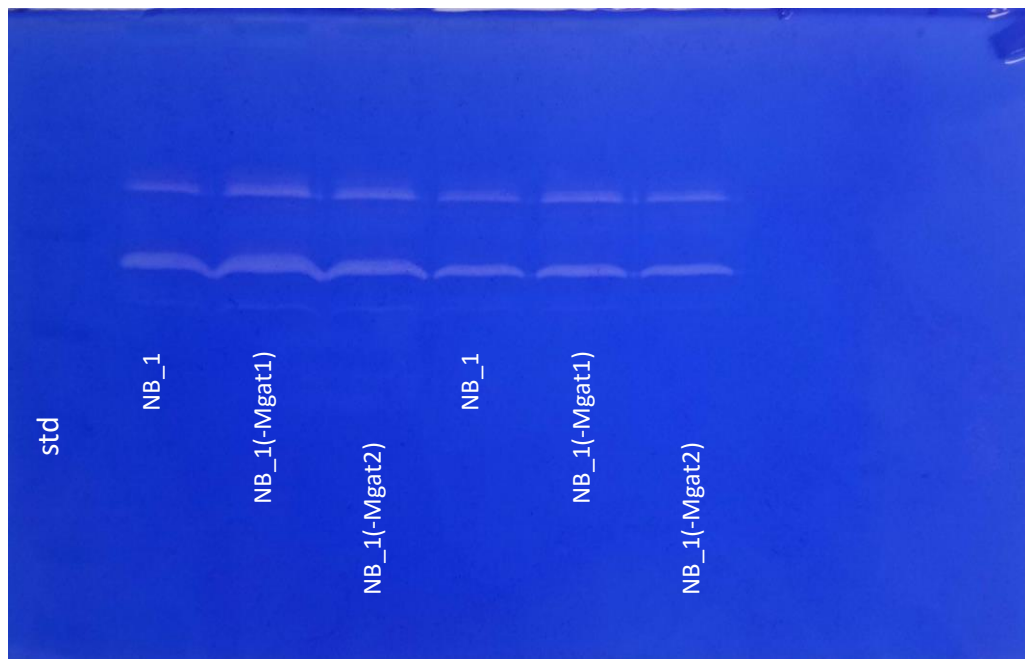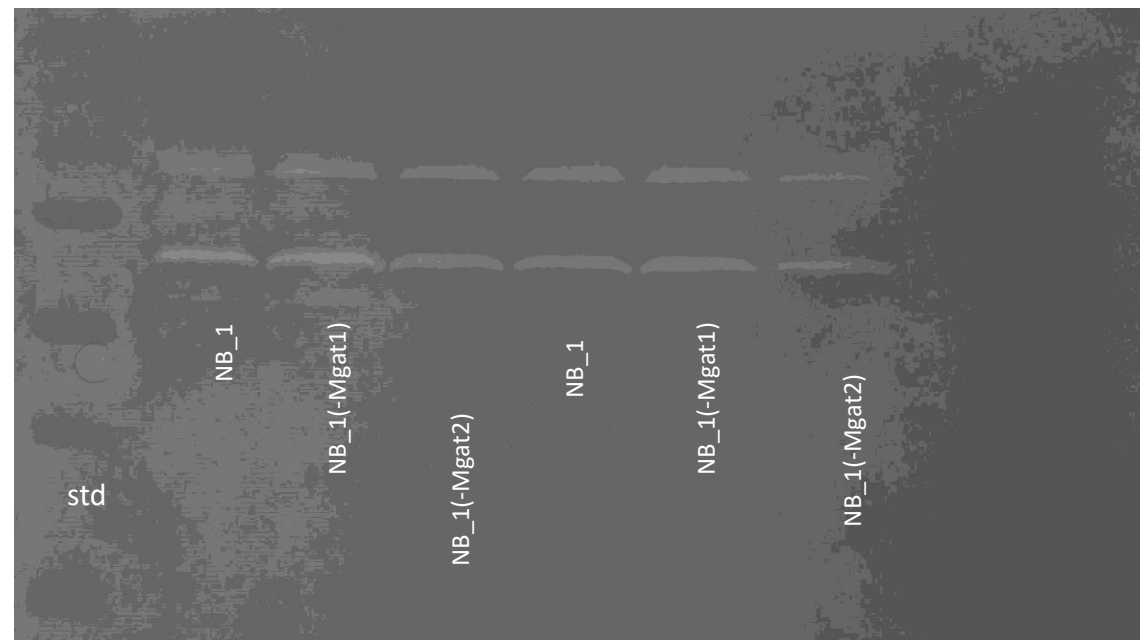

## S2. Gelatinase of 2D samples

Figure 7A

---

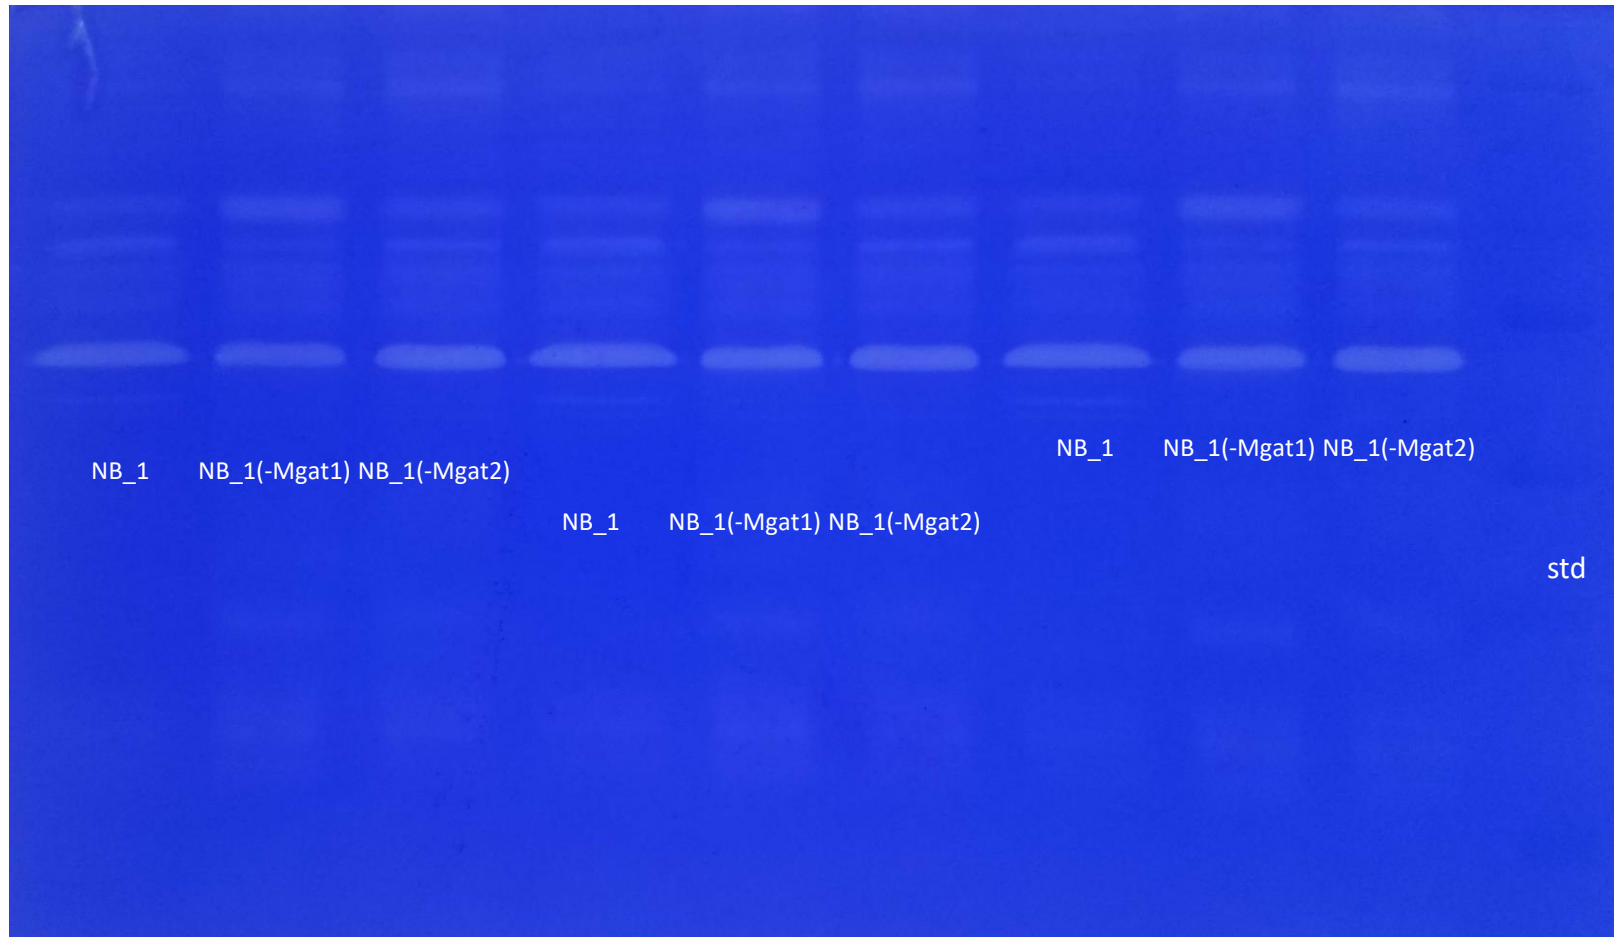

### S3. HK2 detected in 2D and 3D samples

Figure 9A

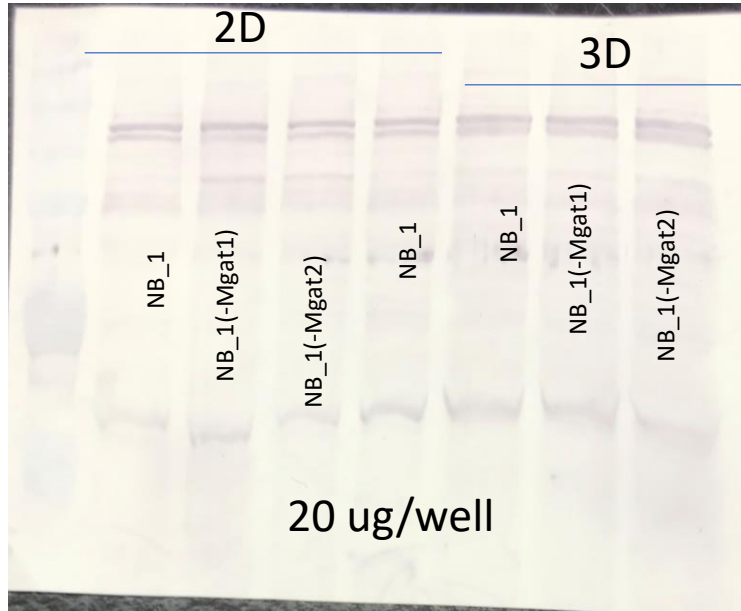

HK2

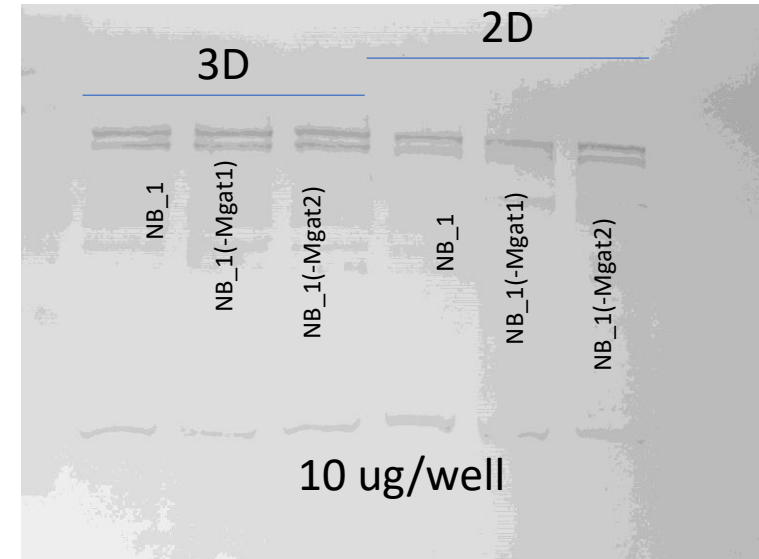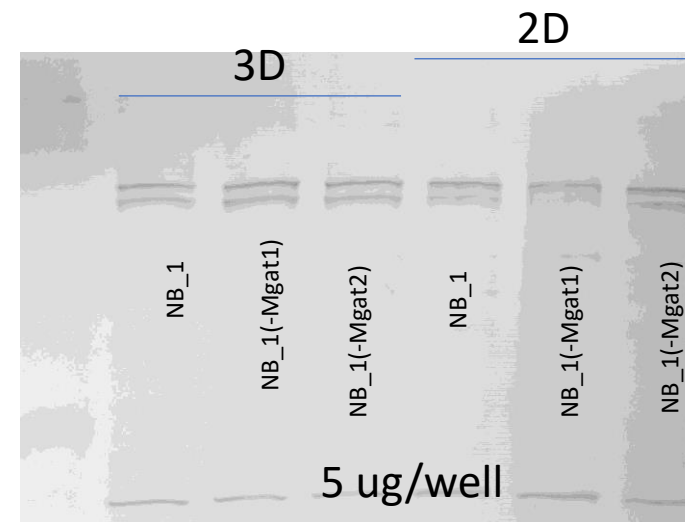

# S4. PALLADIN detected in 2D and 3D samples

Figure 9A

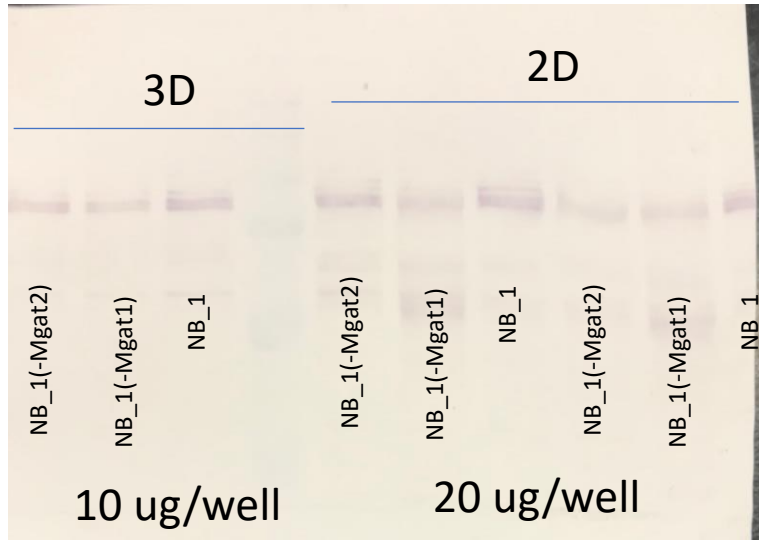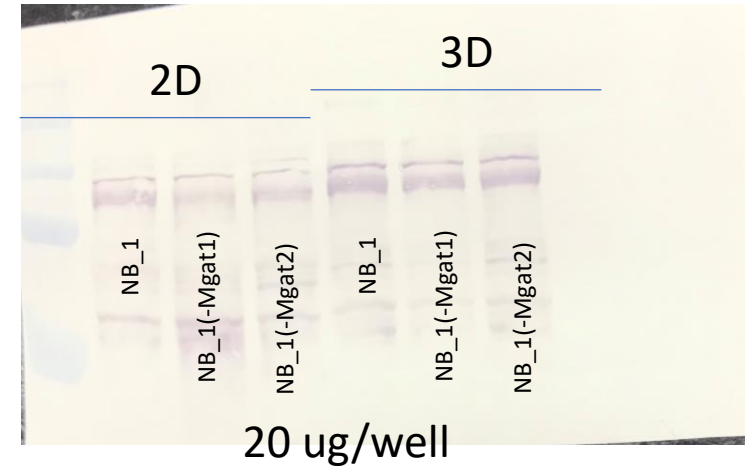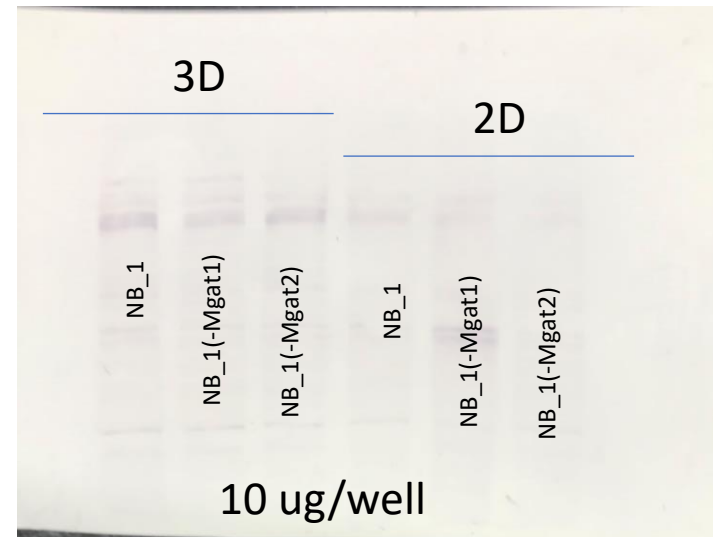

# S5. Vimentin detected in 2D and 3D samples

Vimentin

Figure 9A

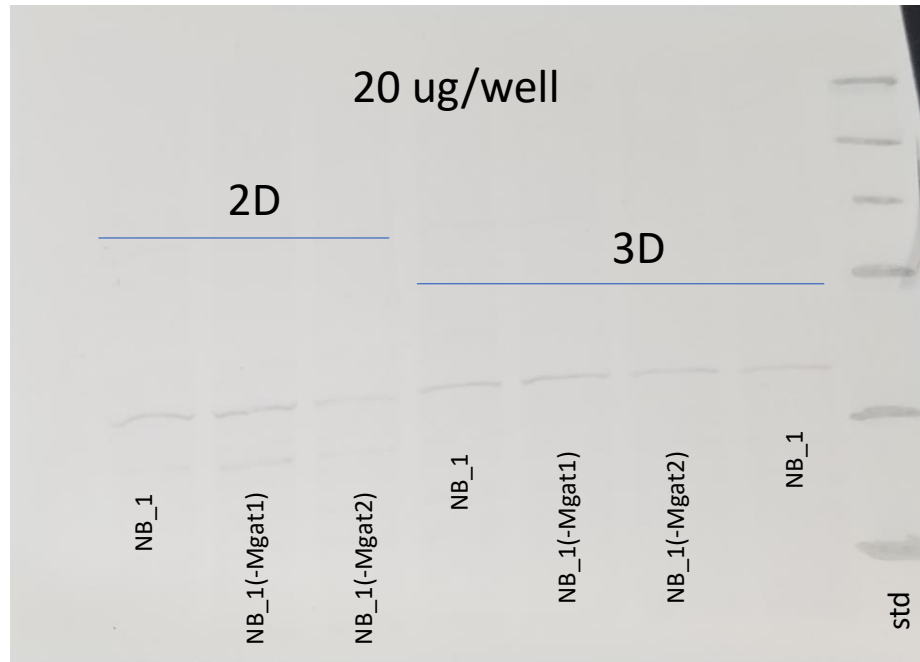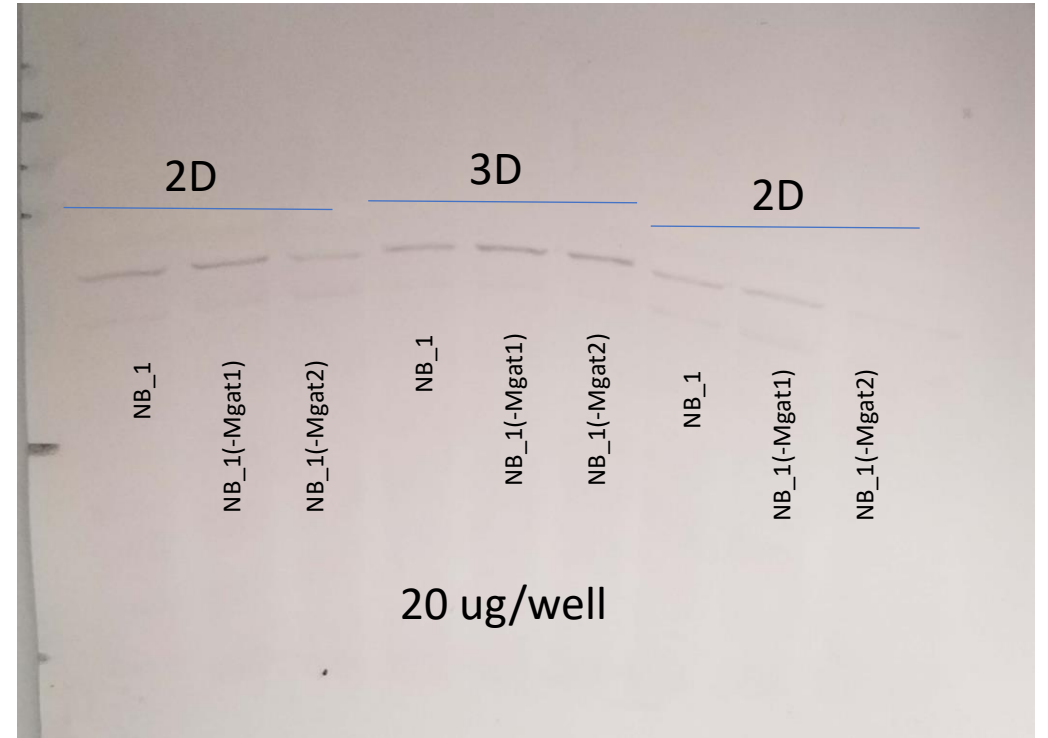

# S6. EGFR detected in 2D and 3D samples

Figure 9A

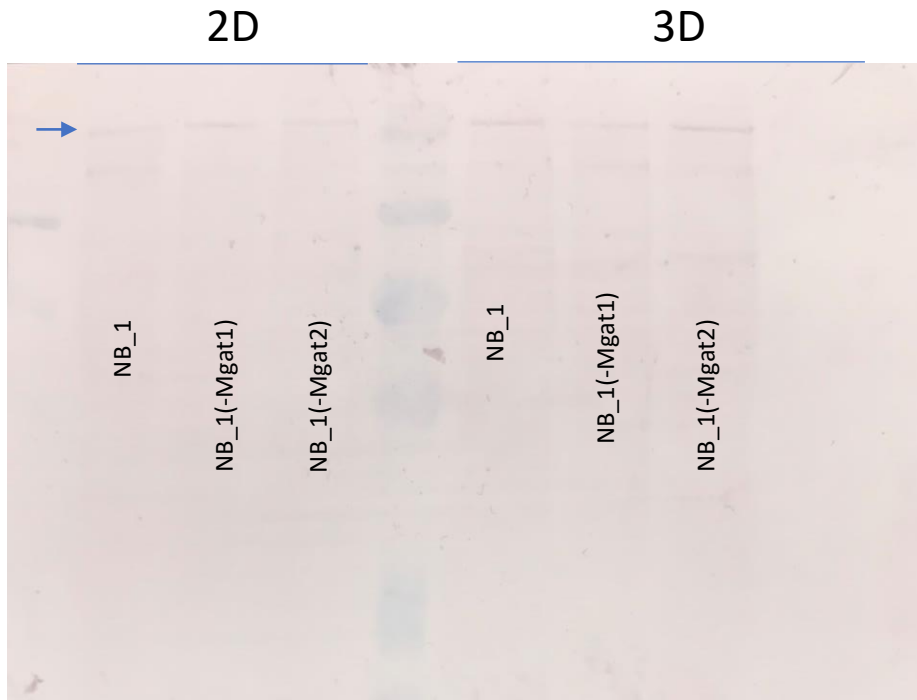

20 ug/well

2D

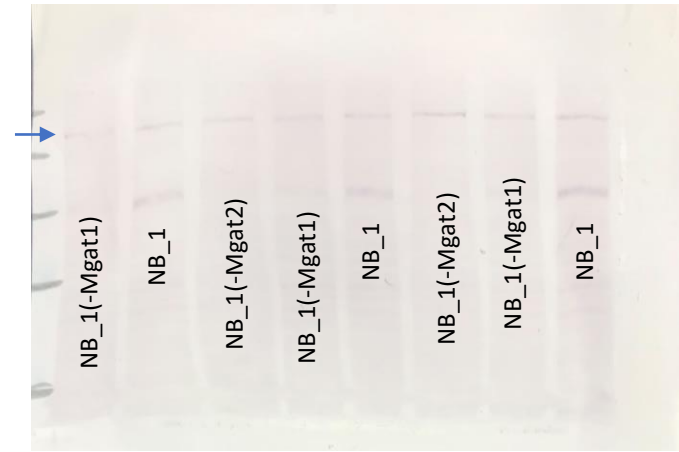

3D

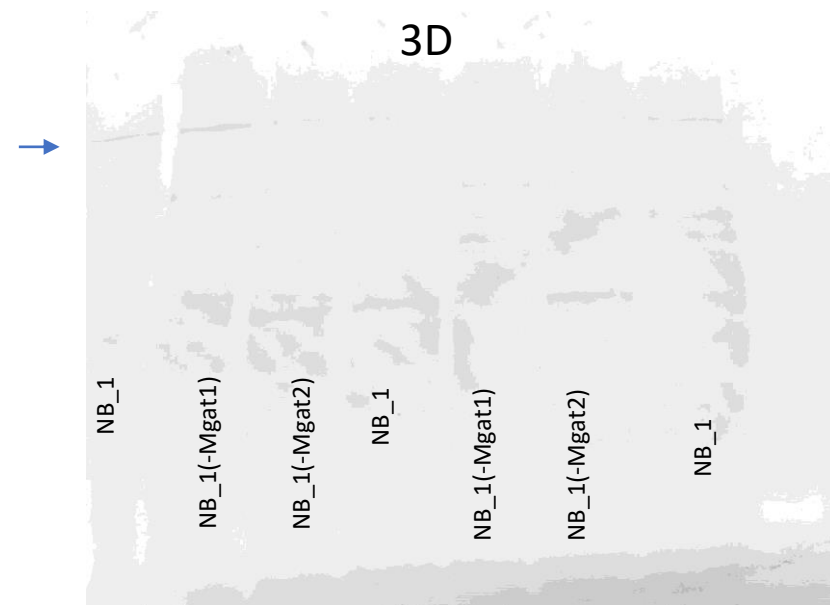

## S7. Coomassie Blue Stained Gels

Figure 9B

2D  
Total membranes

3D Total  
membrane

Figure 7C

3D, CONDITIONED  
MEDIUM

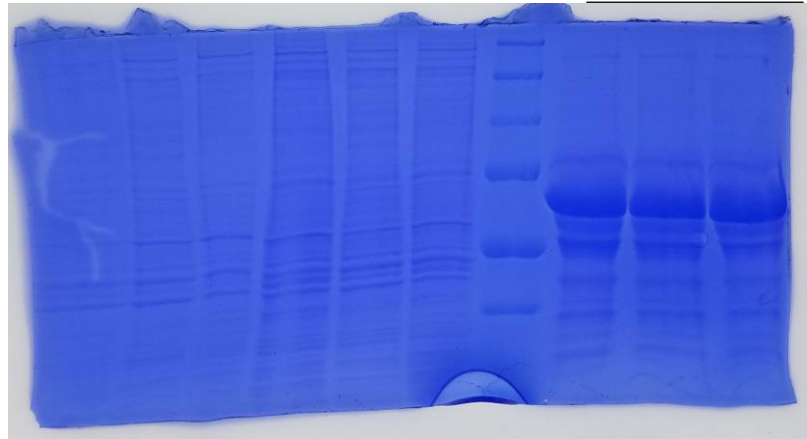

NB\_1

NB\_1(-Mgat1)

NB\_1(-Mgat2)

NB\_1

NB\_1(-Mgat1)

NB\_1(-Mgat2)

Figure 7a

2D, CONDITIONED  
MEDIUM

3D, CONDITIONED  
MEDIUM

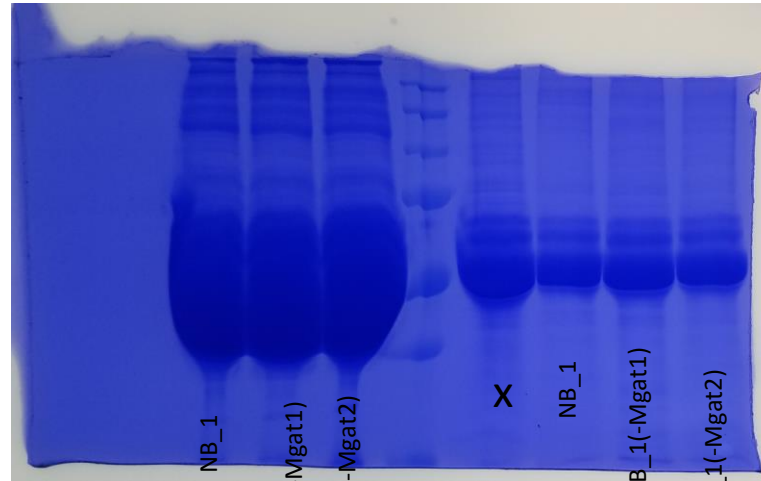

NB\_1

NB\_1(-Mgat1)

NB\_1(-Mgat2)

X

NB\_1

NB\_1(-Mgat1)

NB\_1(-Mgat2)

Figure 9B

2D  
Total membranes

2D  
WHOLE CELL LYSATES

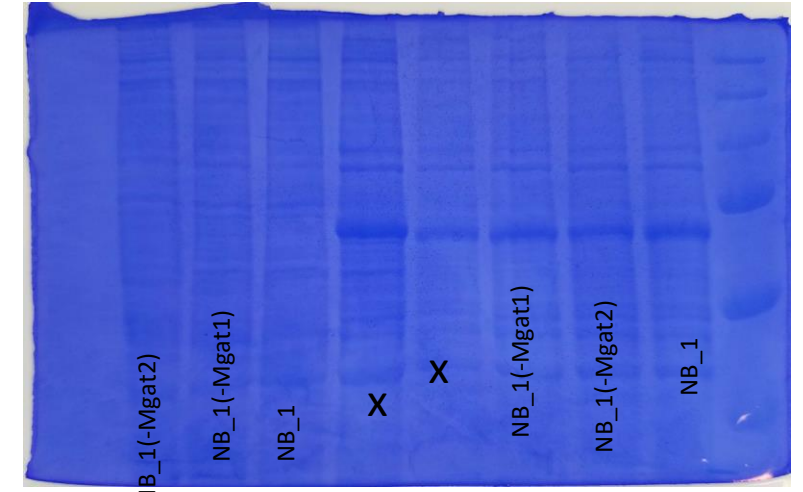

NB\_1(-Mgat2)

NB\_1(-Mgat1)

NB\_1

X

X

NB\_1(-Mgat1)

NB\_1(-Mgat2)

NB\_1

std

# S7. Coomassie Blue Stained Gels, continued

## Figure 9B

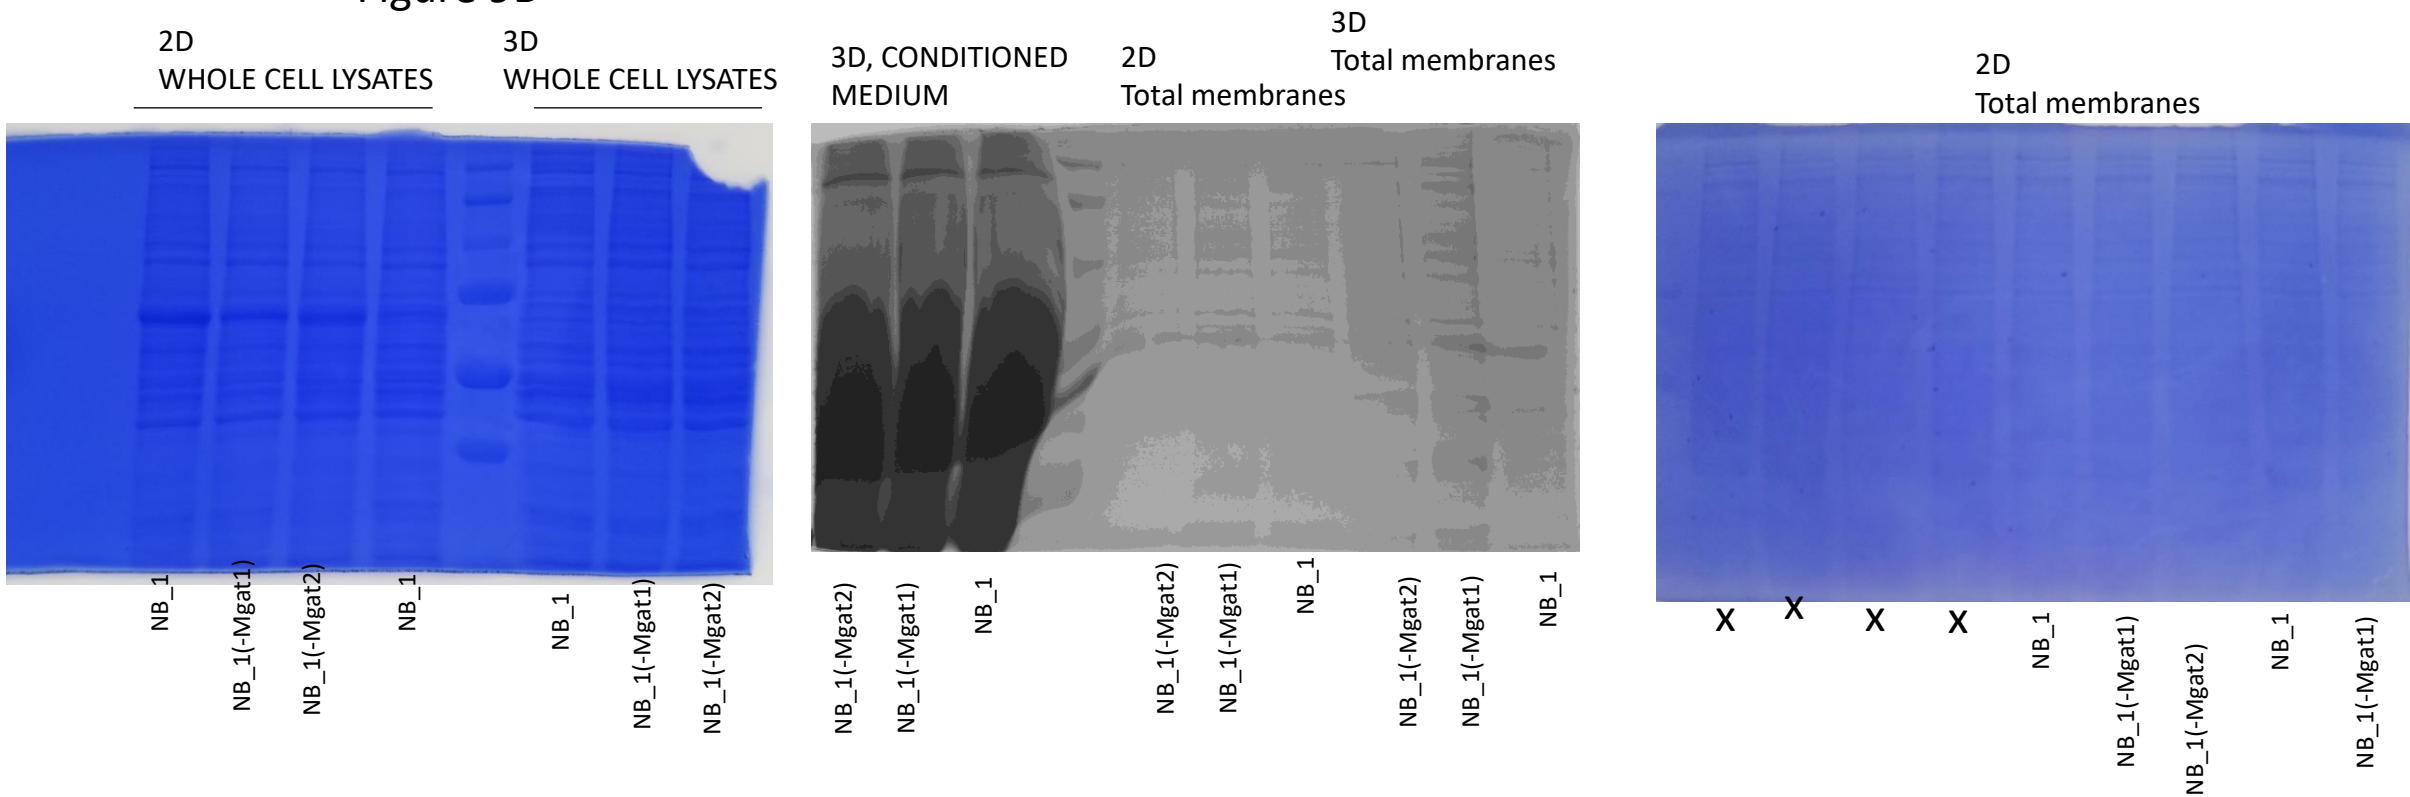



Images were captured using iphone or android cell phones
